1 **Elevated COVID-19 Case Rates of Government Employees, District of Columbia, 2020-22**

2 Xinyi Hua, MPH, Jingjing Yin, PhD, Isaac C. H. Fung, PhD\*

3 ORCID: Xinyi Hua: 0000-0001-9368-1228; Isaac C. H. Fung: 0000-0001-5496-2529

4 Author affiliations: Georgia Southern University, Statesboro, Georgia, USA (X. Hua, J. Yin, I.  
5 C. H. Fung)

6 \*Corresponding author: Isaac C. H. Fung, PhD, Department of Biostatistics, Epidemiology and  
7 Environmental Health Sciences, Jiann-Ping Hsu College of Public Health, PO Box 7989,  
8 Georgia Southern University, Statesboro, GA 30460, USA. Email: cfung@georgiasouthern.edu  
9 Telephone: 912-478-5079

10 **Manuscript category:** Research Letter

11 **Abstract word count:** 50 (max. 50); **Text word count:** 691

12 **Figure:** 1; **Table:** 1

13 **Conflicts of interest statement:** We have no conflicts of interest to declare.

14 **Funding:** We do not receive any external funding to conduct this study.

15 **Ethics:** The Georgia Southern University Institutional Review Board made a non-human subject  
16 determination for this project (H20364) under the G8 exemption category according to the Code  
17 of Federal Regulations Title 45 Part 46.

18 **Article summary line:** Government employees from five D.C. departments, especially fire  
19 fighters and police officers, experienced higher COVID-19 case rates than D.C. residents.

20 **Running title:** COVID-19 Case Rates of D.C. Government Employees

21 *Abstract (50, max.50)*

22 The rate ratios of COVID-19 cases among 5 District of Columbia departments' personnel with  
23 reference to D.C. residents were found greater than one from March 2020 to early January 2022,  
24 suggesting higher case rates for emergency responders and frontline personnel than for general  
25 population. Vaccination is highly recommended.

26

27 **Keywords:** COVID-19, District of Columbia, emergency responders, occupational health

28

29 Due to high frequency of human contacts, a higher rate of Coronavirus Disease 2019 (COVID-  
30 19) cases may be observed among first responders and essential workers than in the general  
31 population (1). Here, we estimated the rate ratios (RR) of COVID-19 cases among personnel  
32 from seven District of Columbia (D.C.) departments with reference to D.C. residents.

33

34 Downloaded from the D.C. COVID-19 surveillance repository (2), the dataset contained the  
35 number of personnel tested positive by reported date. Seven departments were selected for  
36 analysis: Fire and Emergency Medical Services Department (FEMS), Metropolitan Police  
37 Department (MPD), Department of Corrections (DOC), Department of Youth Rehabilitation  
38 Services (DYRS), the Office of Unified Communications (OUC), the Child and Family Services  
39 Agency (CFSA), and Department of Motor Vehicle (DMV). We used the full-time equivalent  
40 hours reported to estimate the employee number in each department in 2020 and 2021 (3).

41

42 With the reported case number as the dependent variable, we applied Poisson regression models  
43 with person-day as the offset to calculate the COVID-19 case RR by department, using D.C.

44 residents as the reference. We assessed the RR over the entire study period (3/7/2020-1/3/2022),  
45 and in four distinct time periods: before COVID-19 vaccination (3/7/2020-12/14/2020), until  
46 50% of D.C. residents were fully vaccinated (12/15/2020-6/14/2021), before 5-to-11-year-olds  
47 were eligible for COVID-19 vaccination (6/15/2021-11/2/2021), and when vaccine was available  
48 to 5-to-11-year-olds and Omicron became the dominant variant (11/3/2021-1/3/2022) (4).  
49 Statistical analysis was performed using R 4.0.3 (R Core Team, R Foundation for Statistical  
50 Computing, Vienna, Austria). The Georgia Southern University Institutional Review Board  
51 made a non-human subject determination for this project (H20364) under the G8 exemption  
52 category according to the Code of Federal Regulations Title 45 Part 46.  
53  
54 Five D.C. departments had higher COVID-19 case rate than D.C. residents from March 7, 2020,  
55 through January 3, 2022 (**Figure 1, Table 1**). FEMS employees' case rate was three times that of  
56 the general population (RR=3.37; 95% CI, 3.17, 3.57). This was followed by DOC (2.67; 95%  
57 CI, 2.45, 2.91), OUC (2.23; 95% CI, 1.87, 2.63) and MPD (2.04; 95% CI, 1.93, 2.14). Stratified  
58 by pandemic stages, the RR changed over time. For example, the RR of DOC dropped from 2.88  
59 (95% CI, 2.41, 3.41) before vaccine roll-out to 1.76 (95% CI, 1.41, 2.17) after vaccine roll-out to  
60 1.09 (0.76, 1.51) after 50% of D.C. residents have been fully vaccinated, and increased to 3.54  
61 (95% CI, 3.15, 3.97) as Omicron variant became dominant. Noteworthy was the observation that  
62 after 50% of D.C. residents were fully vaccinated (3<sup>rd</sup> time-period), only three departments had  
63 statistically significant elevated case rates: FEMS (2.47; 95% CI, 2.05, 2.94), OUC (1.83; 95%  
64 CI, 1.08, 2.89) and MPD (1.56; 95% CI, 1.33, 1.81). As Omicron variant spread rapidly in D.C.  
65 (4<sup>th</sup> time-period), five D.C. departments had statistically significant elevated case rates: FEMS

66 (4.20; 95% CI, 3.86, 4.56), DOC (3.54; 95% CI, 3.15, 3.97), OUC (2.54; 95% CI, 1.95, 3.25),  
67 MPD (2.05; 95% CI, 1.89, 2.22), and DYRS (1.71; 95% CI, 1.30, 2.19).

68  
69 Gradual decline in RR was observed in some departments such as DOC. This might reflect DOC  
70 effort to suppress COVID-19 transmission among its staff and residents as described elsewhere  
71 (5). However, DOC had a major surge among its personnel and residents when the Omicron  
72 variant was rapidly spreading in D.C. in the 4<sup>th</sup> time period (6).

73  
74 The estimated RR of FEMS and MPD were consistently greater than one, both overall and by  
75 each time period, reflecting that their employees have been on the front lines of providing  
76 support and services to the local community as the pandemic continues. Overall, personnel from  
77 five out of seven D.C. departments experienced higher COVID-19 case rates than D.C. residents.

78  
79 Our study had limitations. First, the data were analyzed by report date as symptoms onset date  
80 was unavailable. Second, asymptotically infected individuals might not get tested; case rate is  
81 an underestimate of the underlying infection rate. Third, gender and age-specific RR by  
82 occupation were unavailable as such demographic information of D.C. governmental employees  
83 was not publicly available.

84  
85 Five D.C. departments had occupation-specific elevated COVID-19 case rates in 2020-22.  
86 Government employees providing service in the front lines should consider vaccination  
87 (including boosters) to protect themselves against COVID-19.

88

89 **First author's bio:** Ms. Xinyi Hua is a doctoral student in epidemiology at Georgia Southern  
90 University. Her research interest is in infectious disease epidemiology.

91  
92 **References (max. 10)**

- 93  
94 1. McGuire SS, Klassen AB, Heywood J, Sztajnkrzyer MD. Prevalence of COVID-19 IgG  
95 Antibodies in a Cohort of Municipal First Responders. *Prehosp Disaster Med.* 2021  
96 Apr;36(2):131-4.
- 97 2. The Government of the District of Columbia. COVID-19 Surveillance 2021 [cited 2022  
98 January 5]; Available from: <https://coronavirus.dc.gov/data>
- 99 3. The Government of District of Columbia. FY 2022 Proposed Budget and Financial Plan  
100 2021 [cited 2021 November 15, 2021]; Available from:  
101 [https://cfo.dc.gov/sites/default/files/dc/sites/ocfo/publication/attachments/DC-GOVT-FY-](https://cfo.dc.gov/sites/default/files/dc/sites/ocfo/publication/attachments/DC-GOVT-FY-2022-BUDGET-VOLUME-1.pdf)  
102 [2022-BUDGET-VOLUME-1.pdf](https://cfo.dc.gov/sites/default/files/dc/sites/ocfo/publication/attachments/DC-GOVT-FY-2022-BUDGET-VOLUME-1.pdf)
- 103 4. Centers for Disease Control and Prevention. COVID Data Tracker: Variant Proportions.  
104 2022 [cited 2022 January 4]; Available from: [https://covid.cdc.gov/covid-data-](https://covid.cdc.gov/covid-data-tracker/#variant-proportions)  
105 [tracker/#variant-proportions](https://covid.cdc.gov/covid-data-tracker/#variant-proportions)
- 106 5. Epting ME, Pluznik JA, Levano SR, Hua X, Fung ICH, Jordan B, et al. Aiming for Zero:  
107 Reducing Transmission of Coronavirus Disease 2019 in the D.C. Department of  
108 Corrections. *Open Forum Infect Dis.* 2021 Dec;8(12):ofab547.
- 109 6. Gathright J. COVID-19 cases are surging at the D.C. jail 2021 [cited 2021 December  
110 27]; Available from: <https://dcist.com/story/21/12/22/dc-jail-covid-surge/>
- 111 7. Trujillo B. DC Annouces First Known Cases of COVID-19 Omicron Variant; 4 Test  
112 Positive. 2021 [cited 2022 January 3]; Available from:  
113 [https://www.nbcwashington.com/news/coronavirus/local-impact/dc-announces-first-](https://www.nbcwashington.com/news/coronavirus/local-impact/dc-announces-first-known-cases-of-covid-19-omicron-variant-4-test-positive/2908053/)  
114 [known-cases-of-covid-19-omicron-variant-4-test-positive/2908053/](https://www.nbcwashington.com/news/coronavirus/local-impact/dc-announces-first-known-cases-of-covid-19-omicron-variant-4-test-positive/2908053/)

115  
116  
117  
118  
119  
120  
121  
122  
123  
124

125 **Table 1.** The rate ratio (RR) of COVID-19 cases of seven District of Columbia departments, from March 7<sup>th</sup>, 2020, to January 3<sup>rd</sup>, 2022.  
 126

| Departments                                | 3/7/2020 - 12/14/2020 |                  | 12/15/2020 - 6/14/2021 |                  | 6/15/2021 - 11/2/2021 |                  | 11/3/2021- 1/3/2022 |                  | 3/7/2020 - 1/3/2022<br>(Overall) |                  |
|--------------------------------------------|-----------------------|------------------|------------------------|------------------|-----------------------|------------------|---------------------|------------------|----------------------------------|------------------|
|                                            | RR                    | 95% CI           | RR                     | 95% CI           | RR                    | 95% CI           | RR                  | 95% CI           | RR                               | 95% CI           |
| <i>Fire and Emergency Medical Services</i> | 3.3408                | (2.9448, 3.7710) | 2.3935                 | (2.0605, 2.7609) | 2.4689                | (2.0534, 2.9375) | 4.2004              | (3.8561, 4.5649) | 3.3705                           | (3.1745, 3.5744) |
| <i>Metropolitan Police Department</i>      | 2.3332                | (2.1066, 2.5758) | 1.9385                 | (1.7316, 2.1614) | 1.5578                | (1.3309, 1.8093) | 2.0501              | (1.8863, 2.2233) | 2.0371                           | (1.9332, 2.1447) |
| <i>Department of Corrections</i>           | 2.8761                | (2.4052, 3.4051) | 1.7642                 | (1.4089, 2.1749) | 1.0905                | (0.7592, 1.5066) | 3.5442              | (3.1473, 3.9734) | 2.6732                           | (2.4511, 2.9084) |
| <i>Youth Rehabilitation Services</i>       | 1.9303                | (1.3858, 2.6018) | 1.8721                 | (1.3315, 2.5425) | 0.7038                | (0.3381, 1.2689) | 1.7069              | (1.3042, 2.1851) | 1.6614                           | (1.4036, 1.9490) |
| <i>Office of Unified Communications</i>    | 1.4653                | (0.9244, 2.1847) | 2.7338                 | (1.9444, 3.7127) | 1.8336                | (1.0752, 2.8850) | 2.5445              | (1.9489, 3.2508) | 2.2259                           | (1.8686, 2.6262) |
| <i>Child and Family Services Agency</i>    | 0.6249                | (0.3788, 0.9597) | 1.4248                 | (1.0317, 1.9070) | 0.7504                | (0.4226, 1.2151) | 1.0297              | (0.7715, 1.3377) | 0.9974                           | (0.8319, 1.1835) |
| <i>Department of Motor Vehicles</i>        | 1.7649                | (1.0350, 2.7767) | 1.7313                 | (1.0153, 2.7239) | 0.4997                | (0.1243, 1.2955) | 0.3134              | (0.1124, 0.6737) | 1.0095                           | (0.7280, 1.3555) |

- 127
- 128
- 129
- 130
- 131
- 132
- 133
- 134
- 135
1. Residents of D.C. were used as the reference group.
  2. The first COVID-19 case in D.C. was reported on March 7<sup>th</sup>, 2020.
  3. The first dose of the Pfizer-BioNTech COVID-19 vaccination was administered in the United States on December 15<sup>th</sup>, 2020.
  4. Fifty percent of the D.C. residents were considered fully vaccinated on June 14<sup>th</sup>, 2021.
  5. The Centers for Disease Control and Prevention’s Advisory Committee on Immunization Practices made an interim recommendation to use the Pfizer-BioNTech COVID-19 vaccine in teens aged 12 to 15 years on May 12<sup>th</sup>, 2021, and in children aged 5 to 11 years on November 2<sup>nd</sup>, 2021.
  6. The first cases of Omicron variant in D.C. were announced on December 13<sup>th</sup>, 2021 (7).

136 **Figure Legend**

137

138 **Figure 1:** The rate ratio (cross) and 95% confidence intervals (bar) of COVID-19 case rates for seven  
139 District of Columbia departments for five selected time intervals: March 7<sup>th</sup>, 2020-December 14<sup>th</sup>, 2020,  
140 December 15<sup>th</sup>, 2020-June 14<sup>th</sup>, 2021, June 15<sup>th</sup>, 2021-November 2<sup>nd</sup>, 2021, November 3<sup>rd</sup>, 2021-January  
141 3<sup>rd</sup>, 2022, and March 7<sup>th</sup>, 2020-January 3<sup>rd</sup>, 2022. The departments analyzed were: Fire and Emergency  
142 Medical Services Department (FEMS), Metropolitan Police Department (MPD), Department of  
143 Corrections (DOC), Department of Youth Rehabilitation Services (DYRS), the Office of Unified  
144 Communications (OUC), the Child and Family Services Agency (CFSA), and Department of Motor  
145 Vehicle (DMV).

146

RR 03/07~12/14/2020

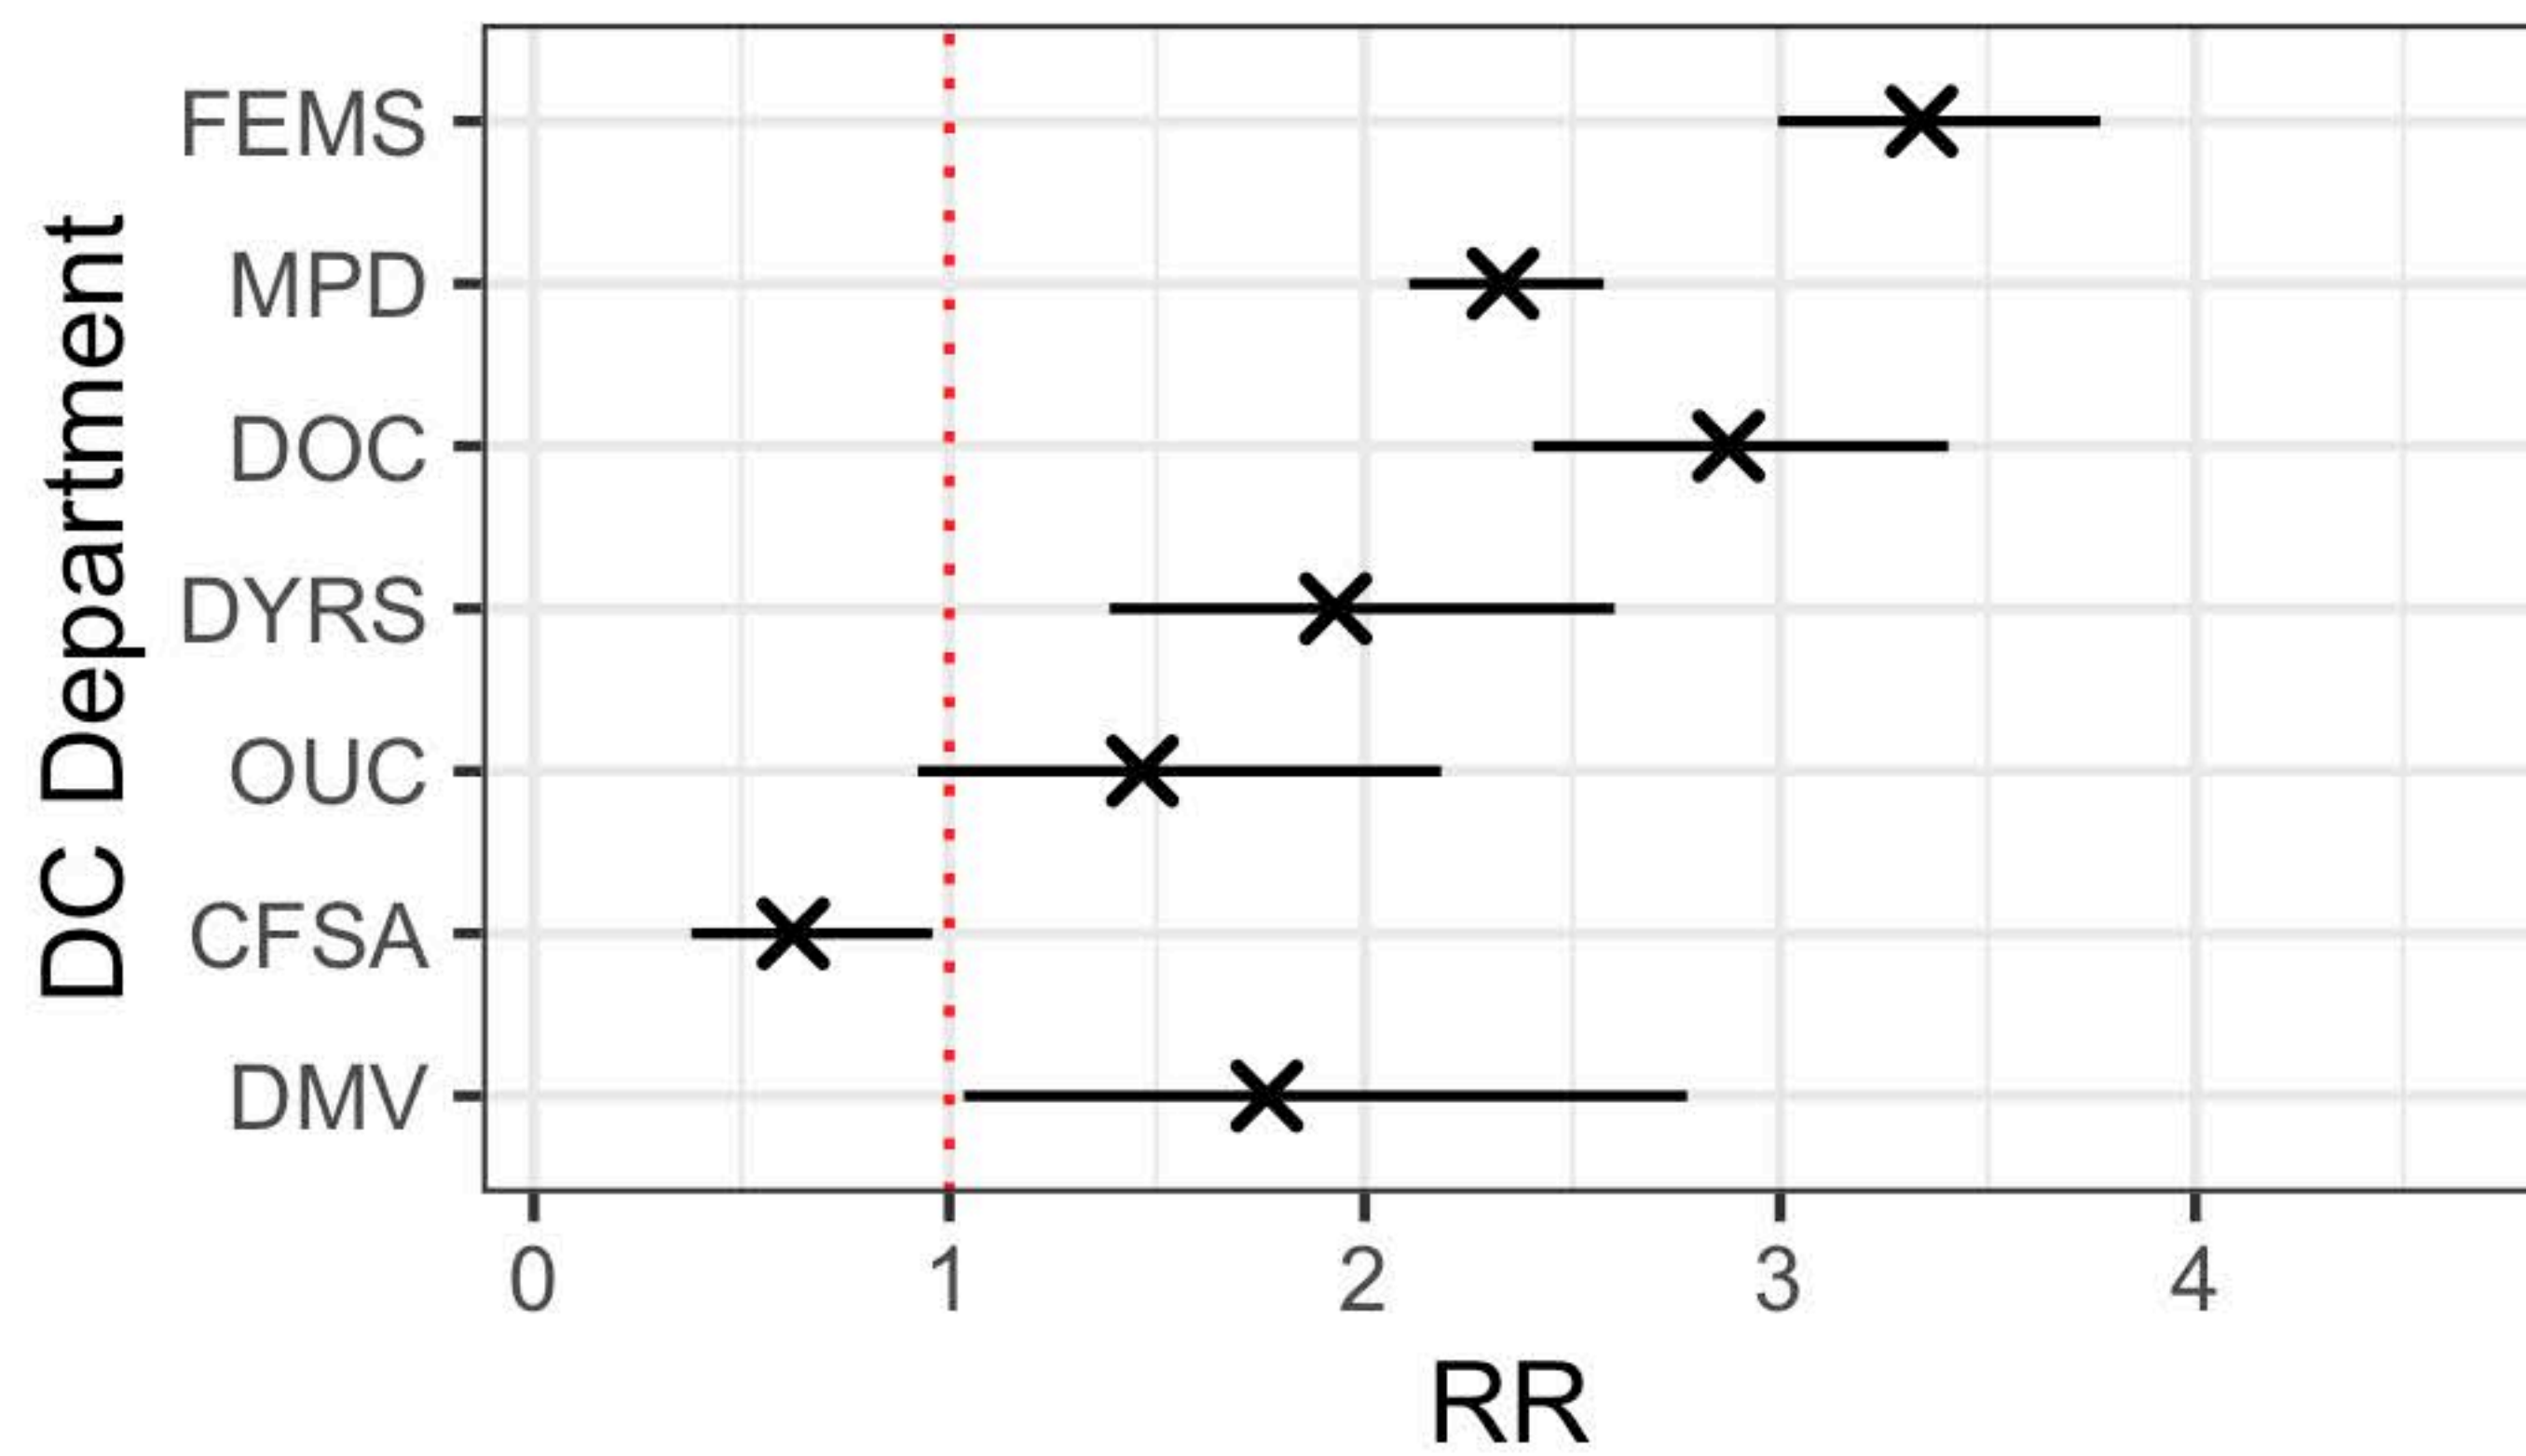

RR 12/25/2020~06/14/2021

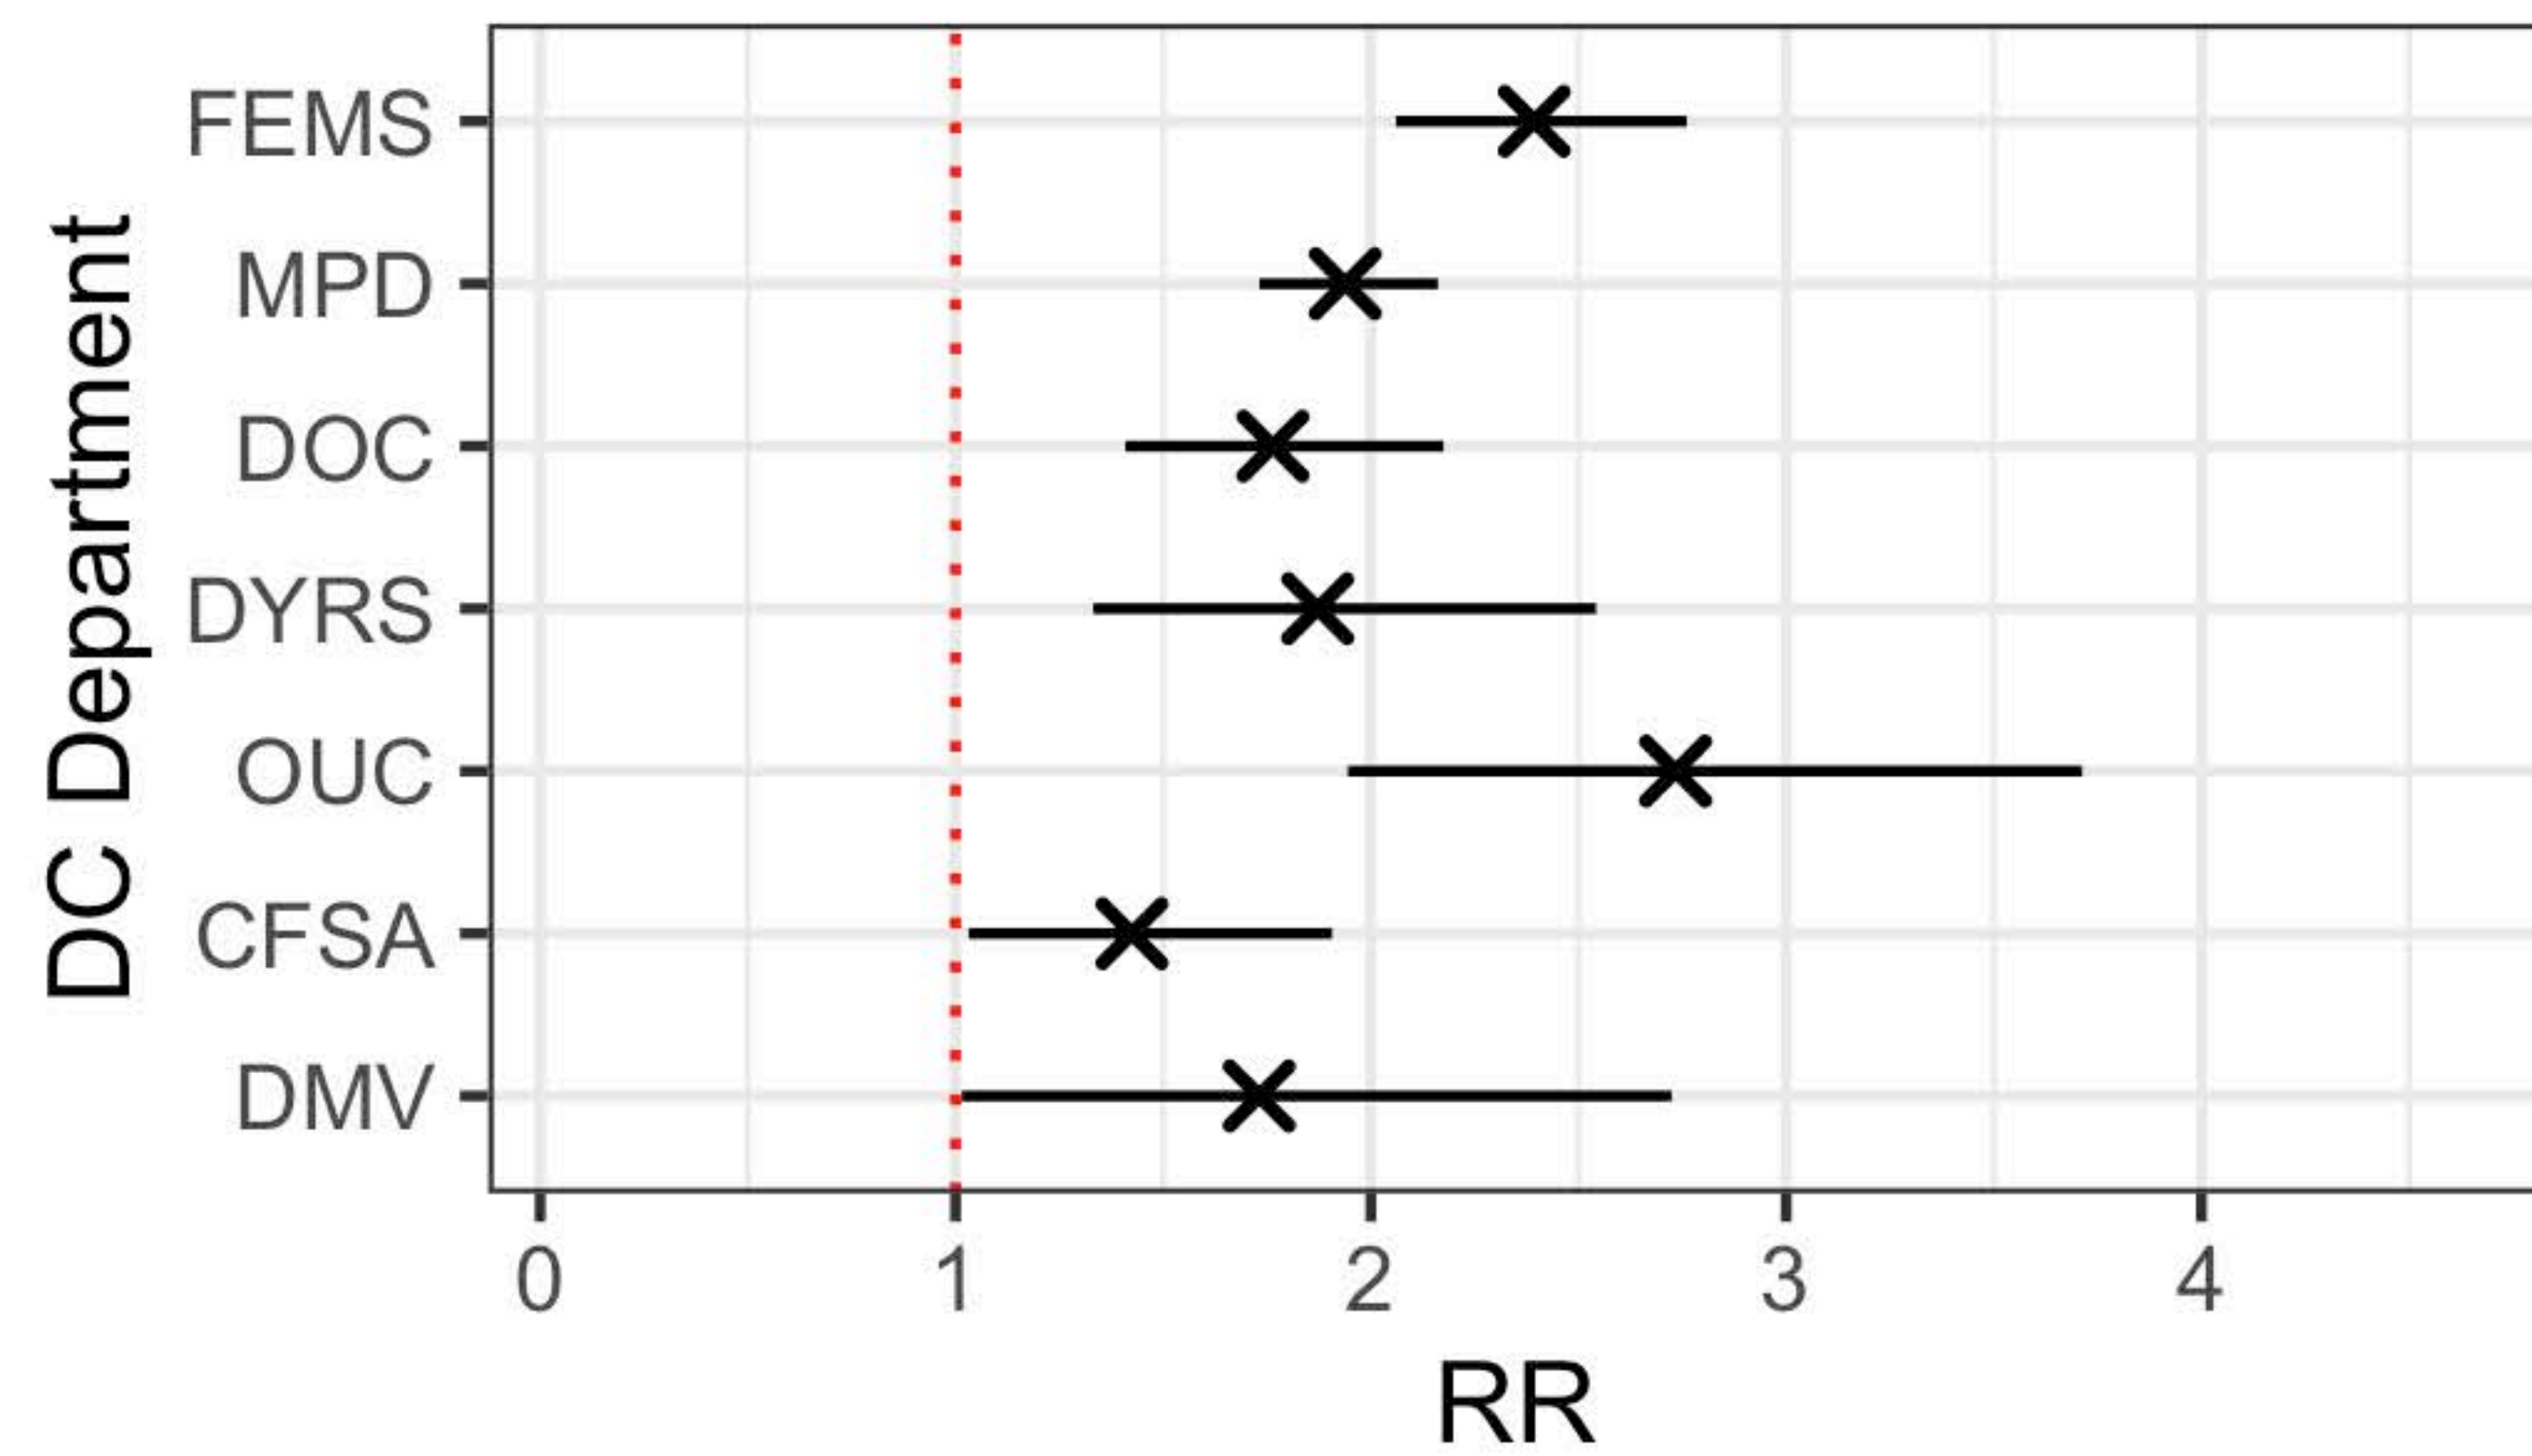

RR 06/15~11/02/2021

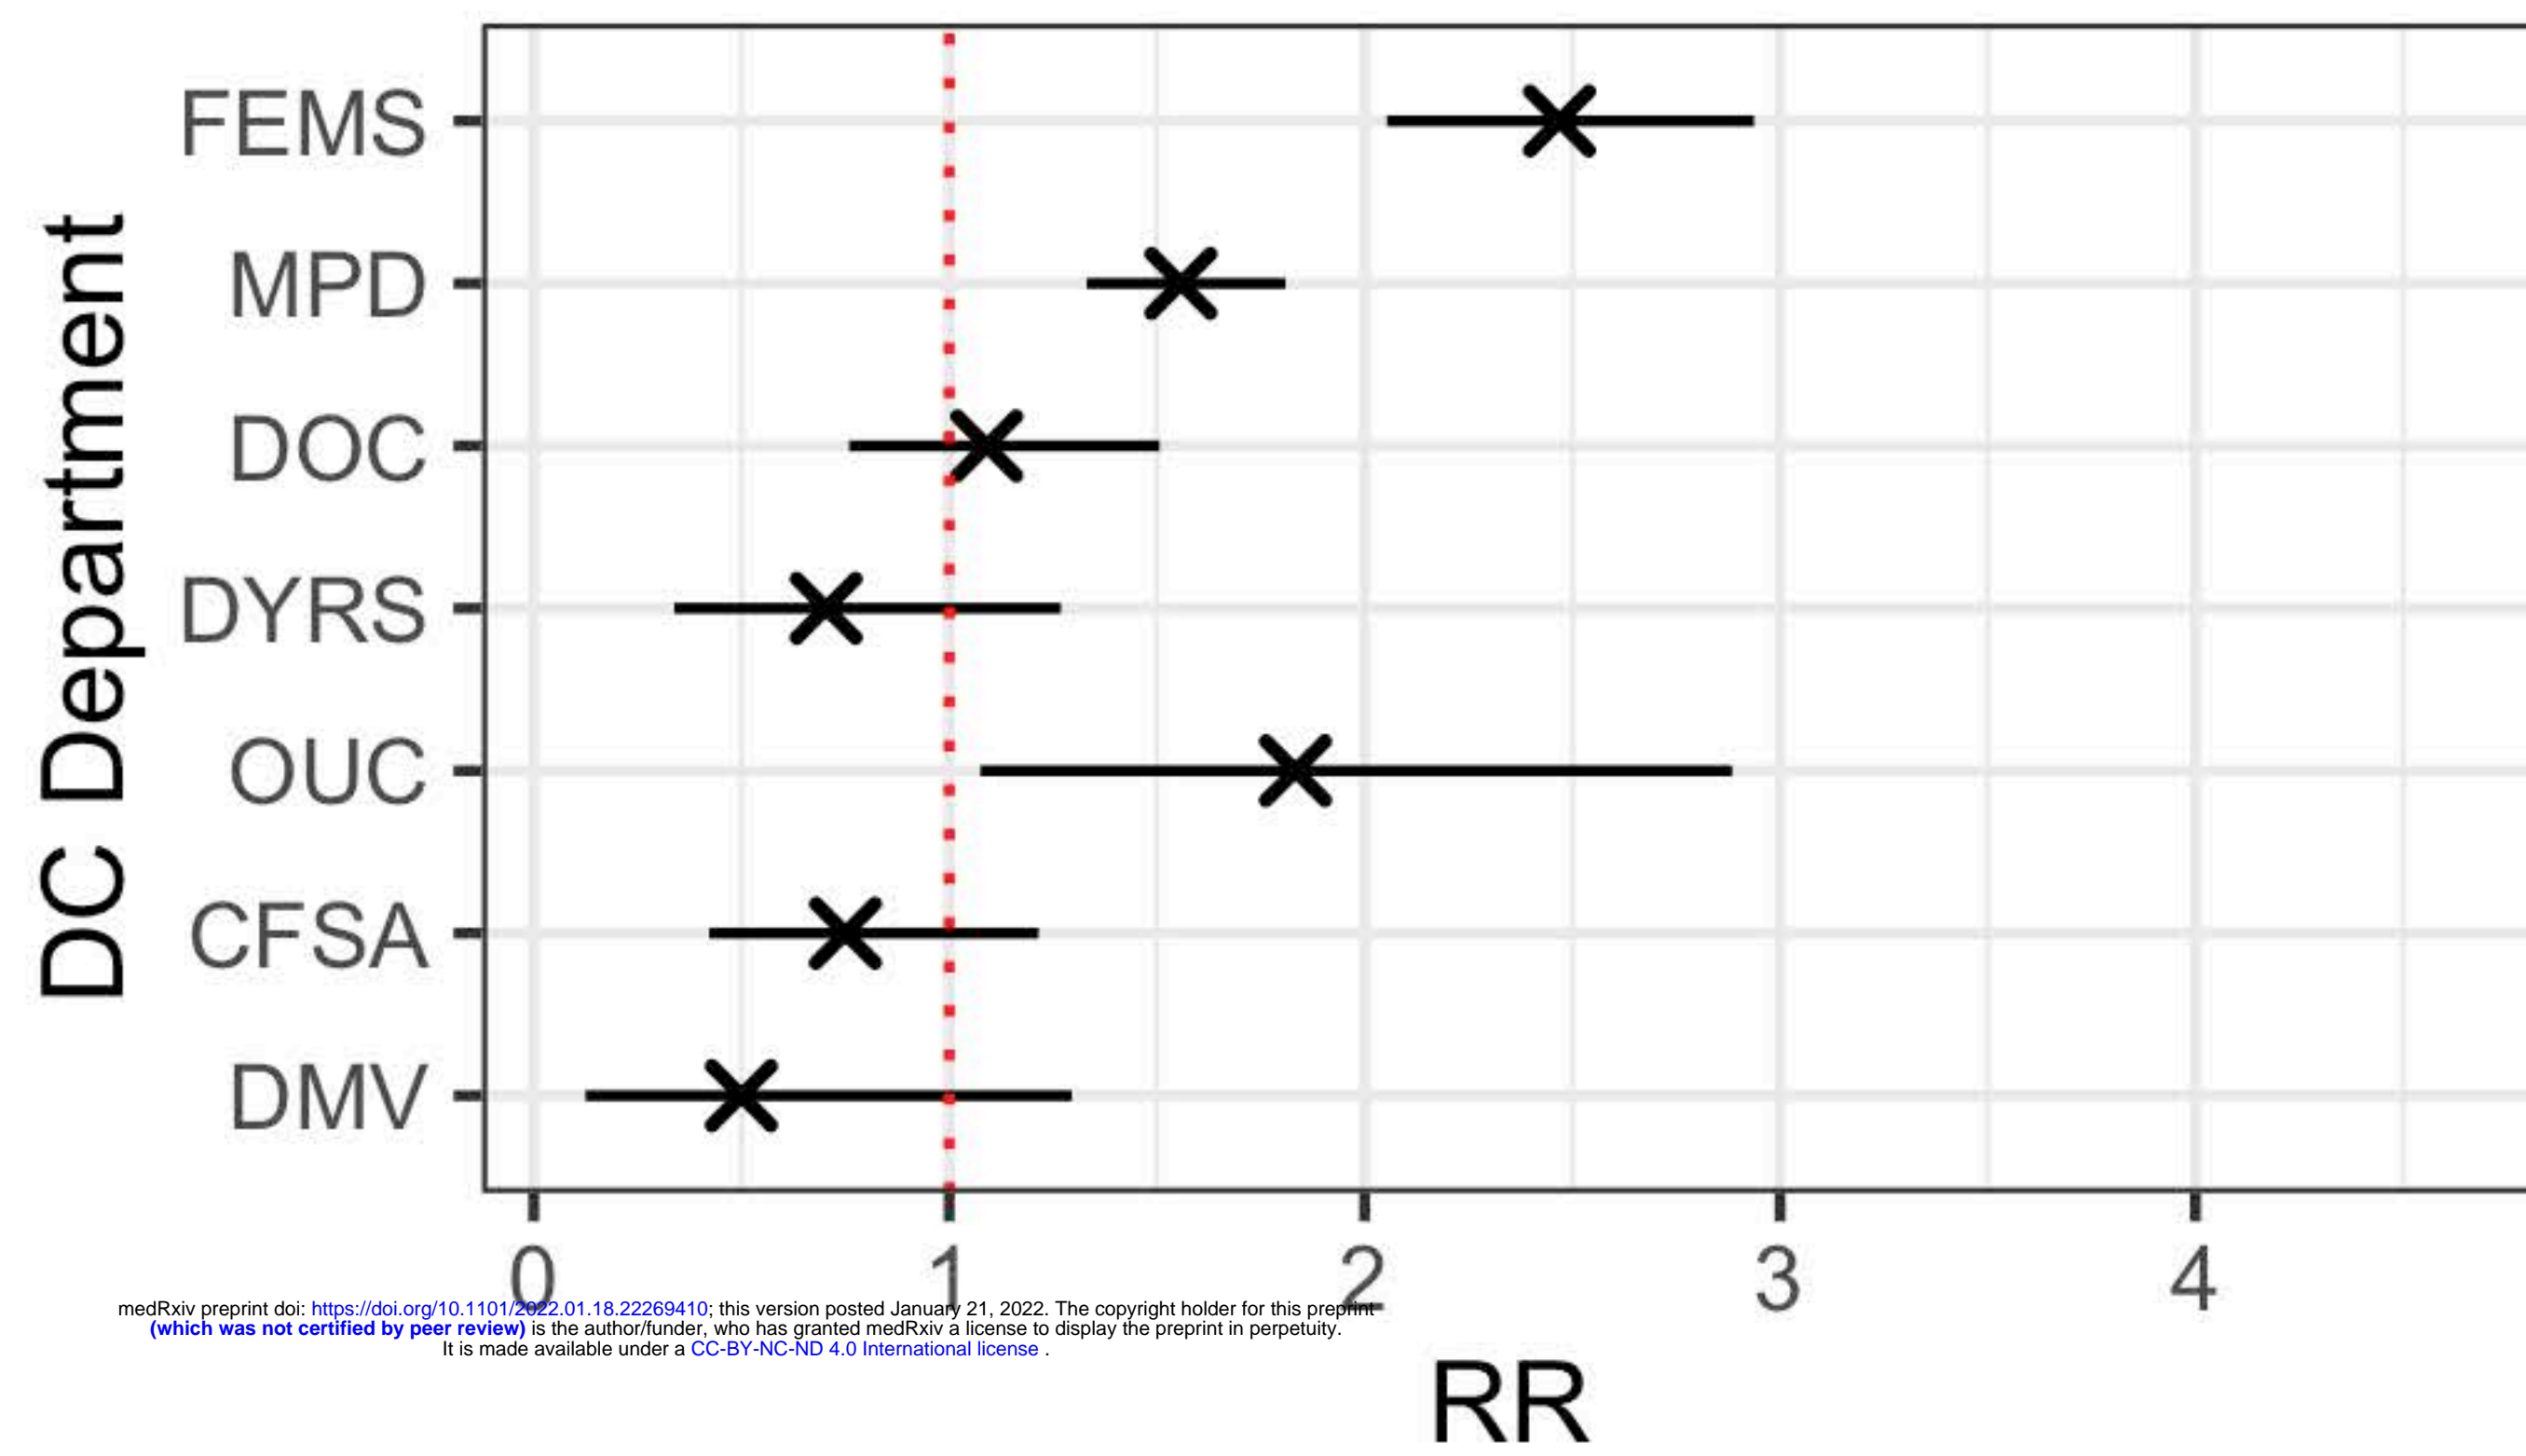

RR 11/03/2021~01/03/2022

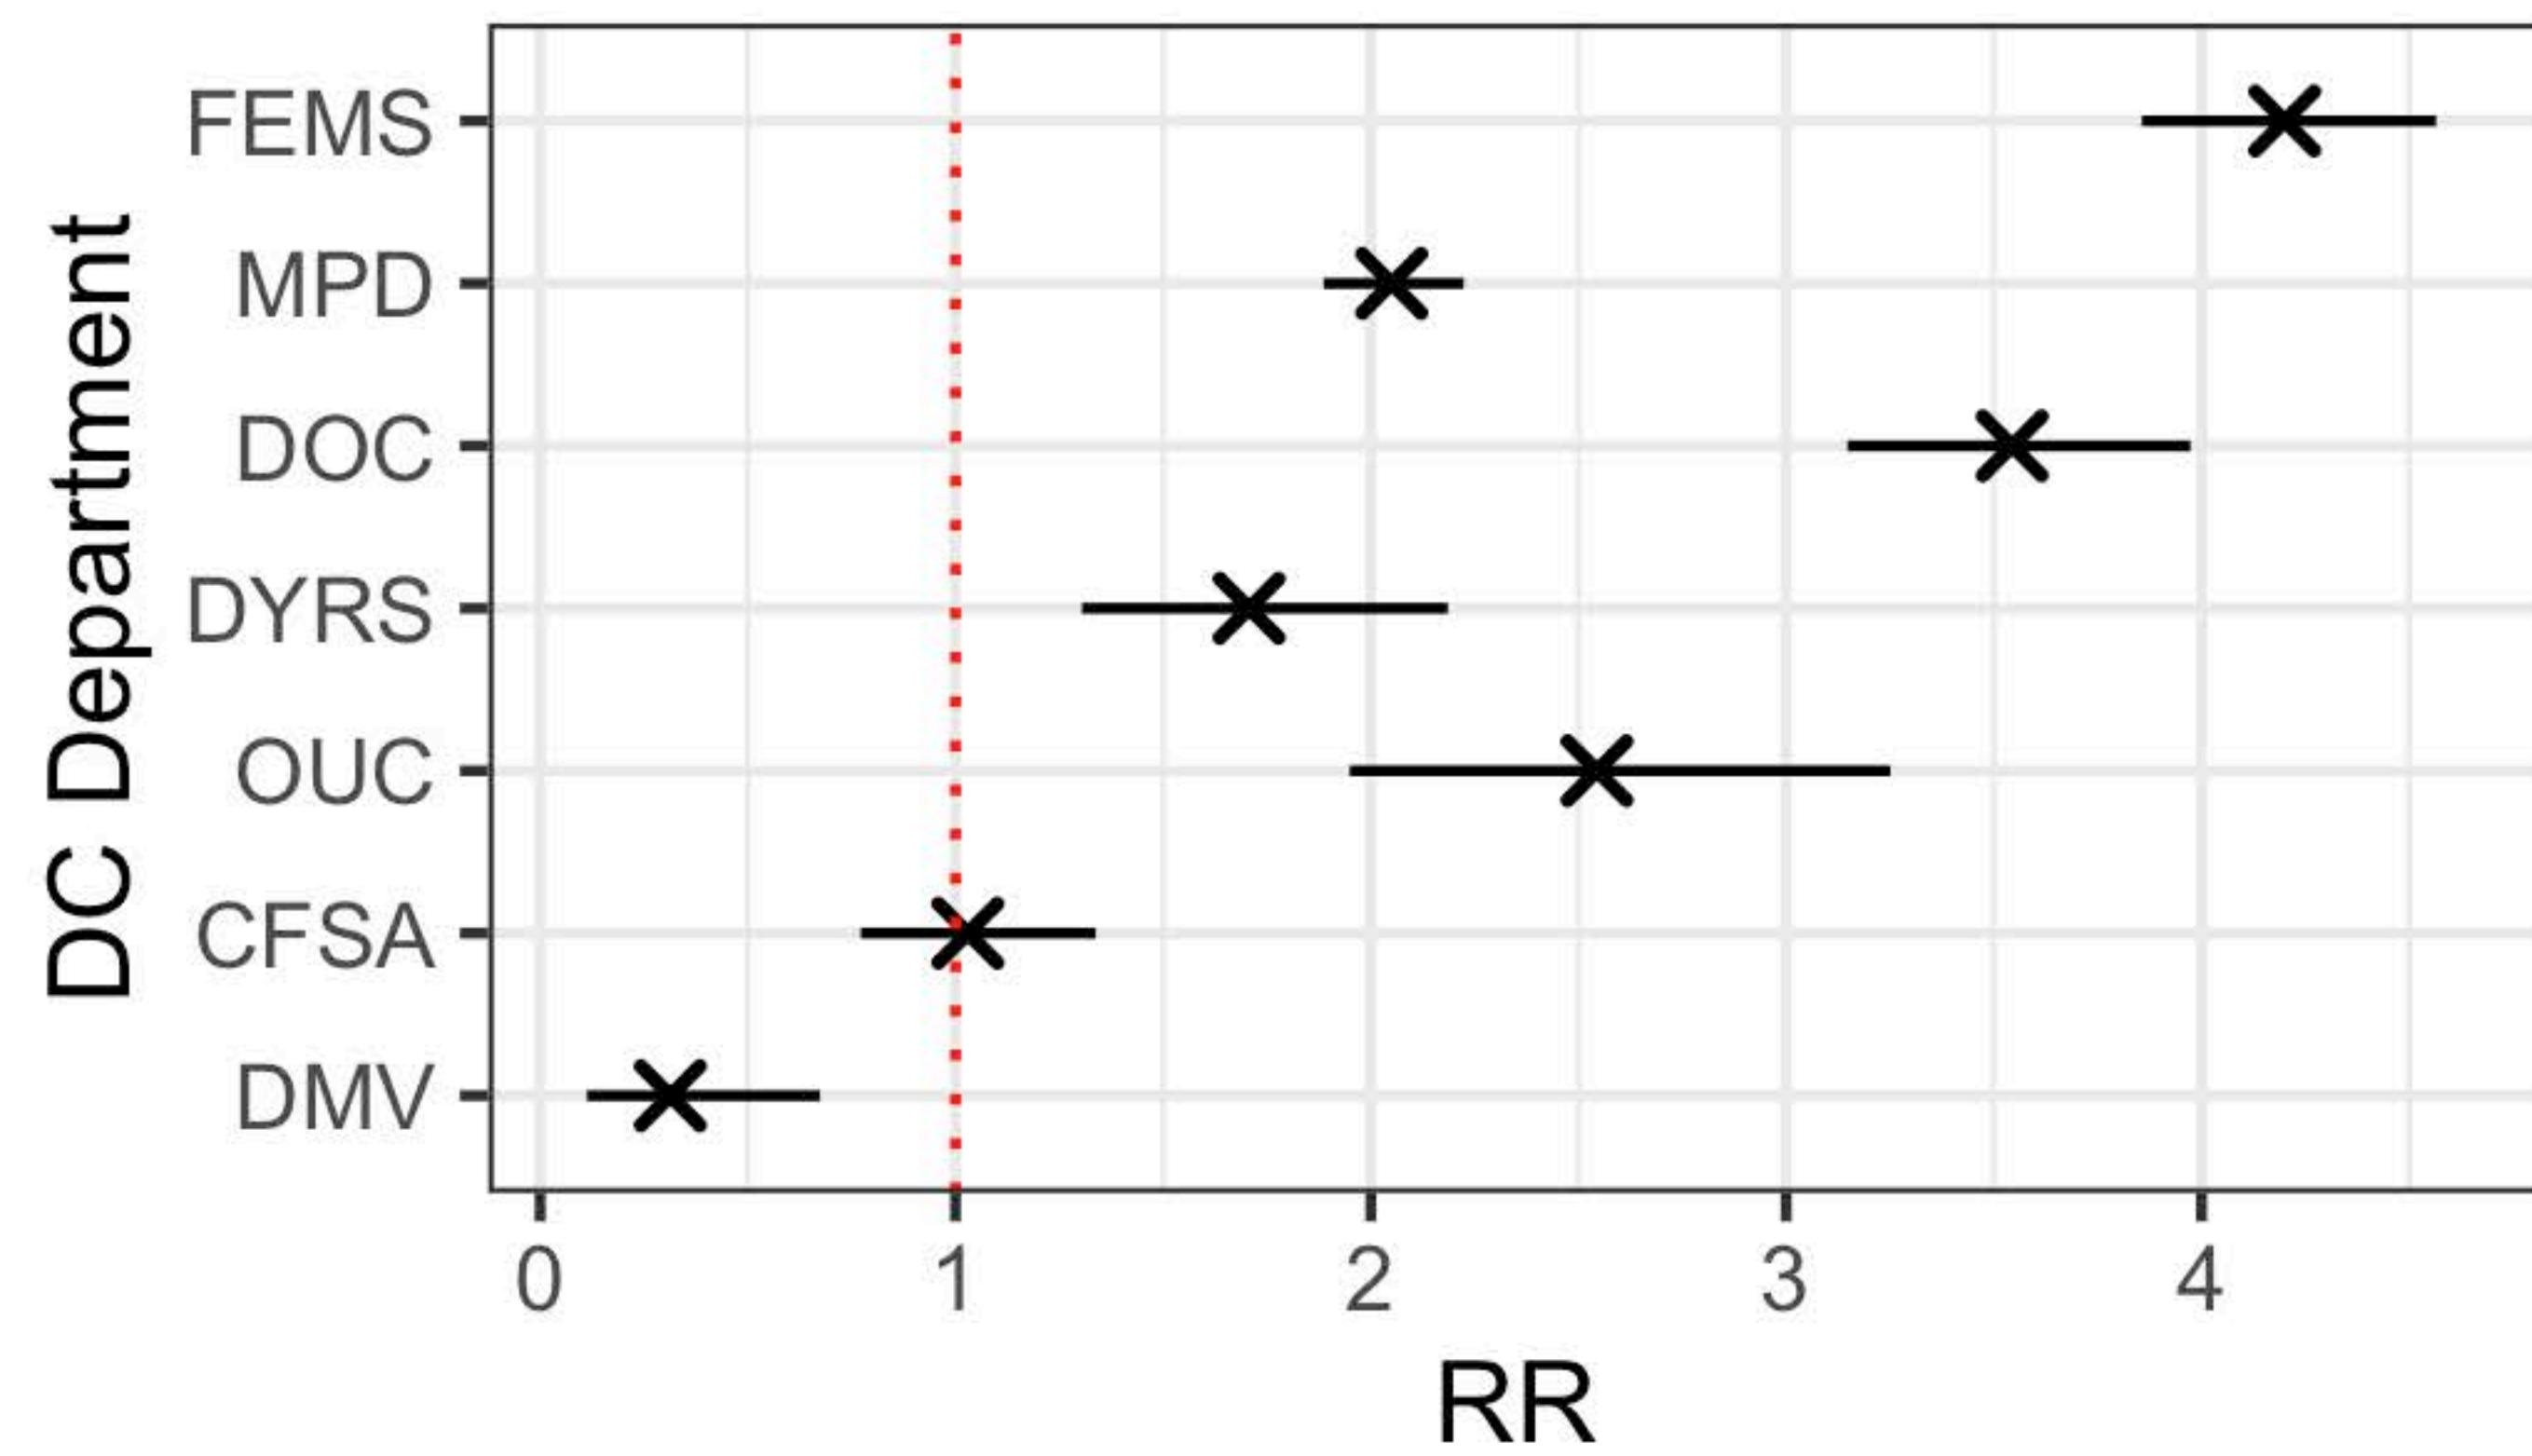

medRxiv preprint doi: <https://doi.org/10.1101/2022.01.18.22269410>; this version posted January 21, 2022. The copyright holder for this preprint (which was not certified by peer review) is the author/funder, who has granted medRxiv a license to display the preprint in perpetuity. It is made available under a [CC-BY-NC-ND 4.0 International license](https://creativecommons.org/licenses/by-nc-nd/4.0/).

RR Overall 03/07/2020~01/03/2022

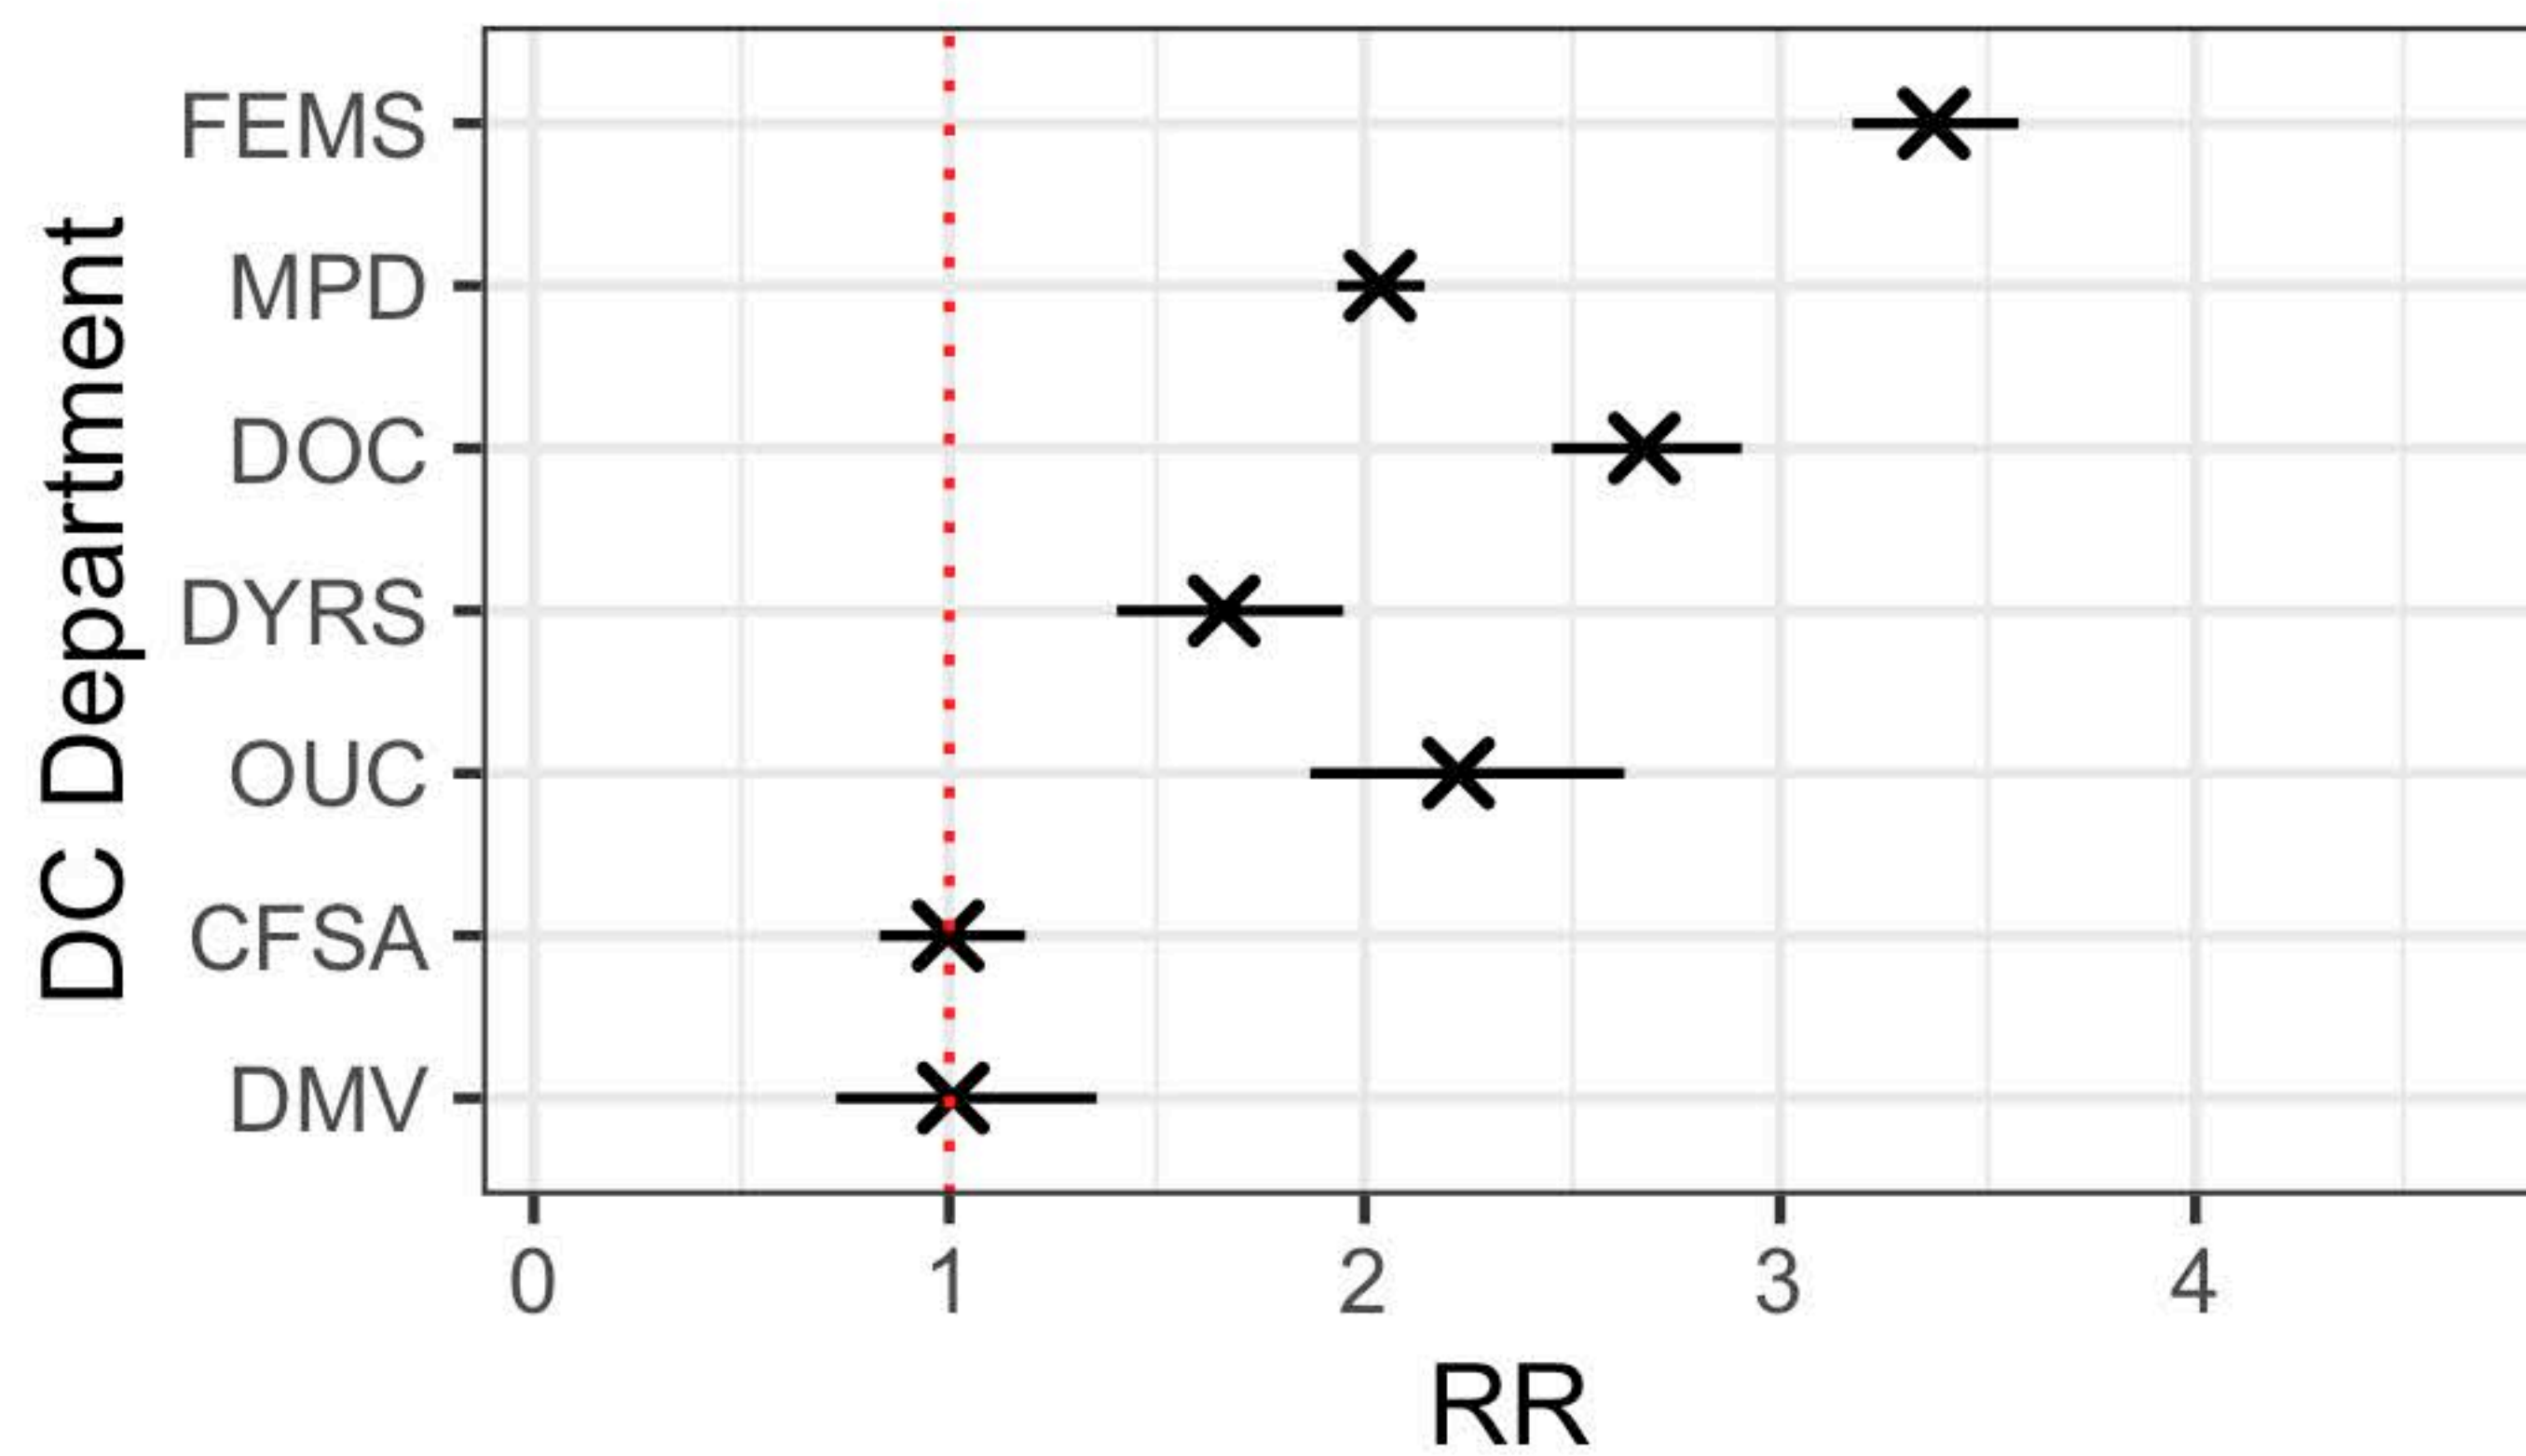

Source: https://medrxiv.org/content/10.1101/2022.01.18.22269410v1.full.pdf
